# Supplementary material for: A new spectrofluorometric method for pyrophosphate assay based on the fluorescence enhancement of trypsin-stabilized copper clusters
Source: Royal Society of Chemistry journal article supplement (doi:10.1039/c4ay02231a), 2014-11-24
Supplement: c4ay02231a1.pdf [file c4ay02231a1.pdf]

## SUPPORTING INFORMATION

*for*

### A new spectrofluorometric method for pyrophosphate assay based on the fluorescence enhancement of trypsin-stabilized copper clusters

Wei Wang,<sup>a</sup> Lei Zhan,<sup>b</sup> Yu Qing Du,<sup>a</sup> Fei Leng,<sup>b</sup> and Cheng Zhi Huang<sup>\*a,b</sup>

<sup>a</sup> Key Laboratory of Luminescent and Real-Time Analytical Chemistry (Southwest University) ,  
Ministry of Education, College of Pharmaceutical Sciences, Southwest University, Chongqing  
400716, P. R. China.

<sup>b</sup> College of Chemistry and Chemical Engineering, Southwest University, Chongqing 400715, P. R.  
China.

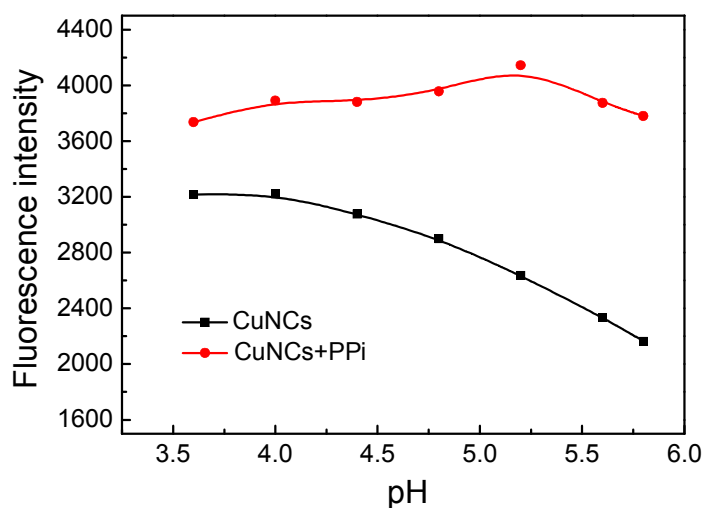

**Fig. S1** Effect of acidity on the fluorescence intensity of this system in CH<sub>3</sub>COOH-CH<sub>3</sub>COONa buffers (pH: 3.6, 4.0, 4.4, 4.8, 5.2, 5.6, 5.8).

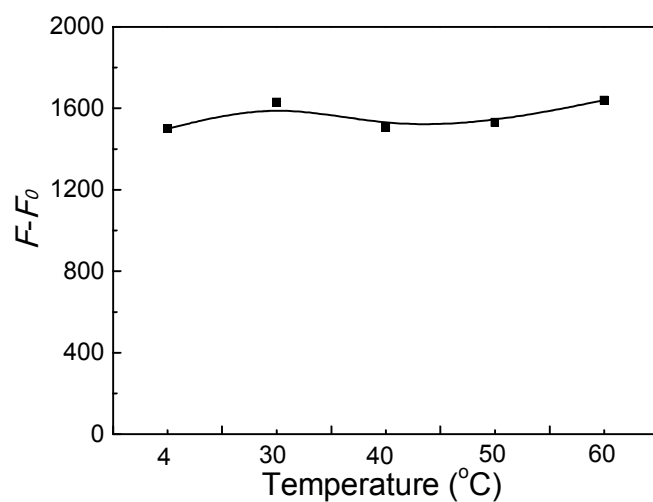

**Fig. S2** Effect of temperature (4, 30, 40, 50, 60 °C) on the fluorescence intensity of this system in  $\text{CH}_3\text{COOH}-\text{CH}_3\text{COONa}$  buffer (pH: 5.2).

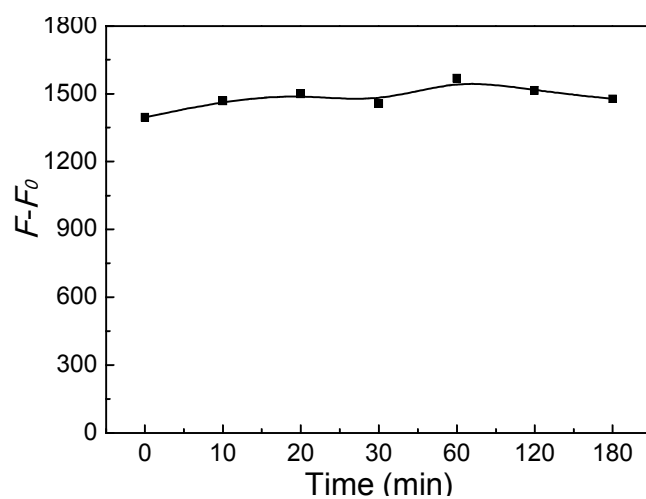

**Fig. S3** Effect of reaction times (0, 10, 20, 30, 60, 120, 180 min) on the fluorescence intensity of this system in  $\text{CH}_3\text{COOH}-\text{CH}_3\text{COONa}$  buffer (pH: 5.2).

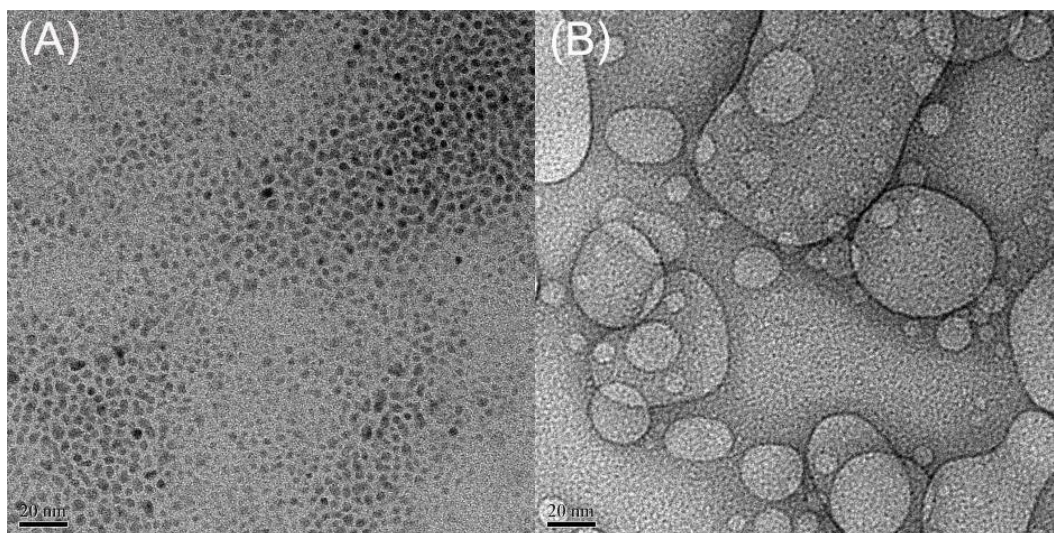

**Fig. S4** TEM images (scale bar: 20 nm) of the CuNCs before(A) and after(B) reacting with PPI (10000  $\mu$ M) in  $\text{CH}_3\text{COOH}-\text{CH}_3\text{COONa}$  buffer (pH: 5.2).

**Table S1** Photophysical data for the CuNCs before and after reacting with different concentrations of PPI.

| Sample                  | Fluorescence lifetime (ns) | Quantum yield (%) | Radiative decay rate constant |
|-------------------------|----------------------------|-------------------|-------------------------------|
| CuNCs                   | 4.1                        | 1.0               | 0.2439                        |
| CuNCs+2500 $\mu$ M PPI  | 3.9                        | 1.1               | 0.2821                        |
| CuNCs+20000 $\mu$ M PPI | 3.6                        | 1.3               | 0.3611                        |

**Table S2** The average hydrodynamic diameters of CuNCs before and after reacting with different concentrations of PPI in  $\text{CH}_3\text{COOH}-\text{CH}_3\text{COONa}$  buffer (pH 5.2).

| Samples                 | hydrodynamic diameter (nm) |
|-------------------------|----------------------------|
| CuNCs                   | 1835                       |
| CuNCs+625 $\mu$ M PPI   | 1166                       |
| CuNCs+10000 $\mu$ M PPI | 637.6                      |
| CuNCs+20000 $\mu$ M PPI | 484.8                      |
